# Supplementary material for: CCL2 stimulation drives rapid postnatal changes in the immune-metabolic phenotype of neonatal monocytes
Source: Research Square preprint supplement (doi:10.21203/rs.3.rs-8294120/v1), 2025-12-12

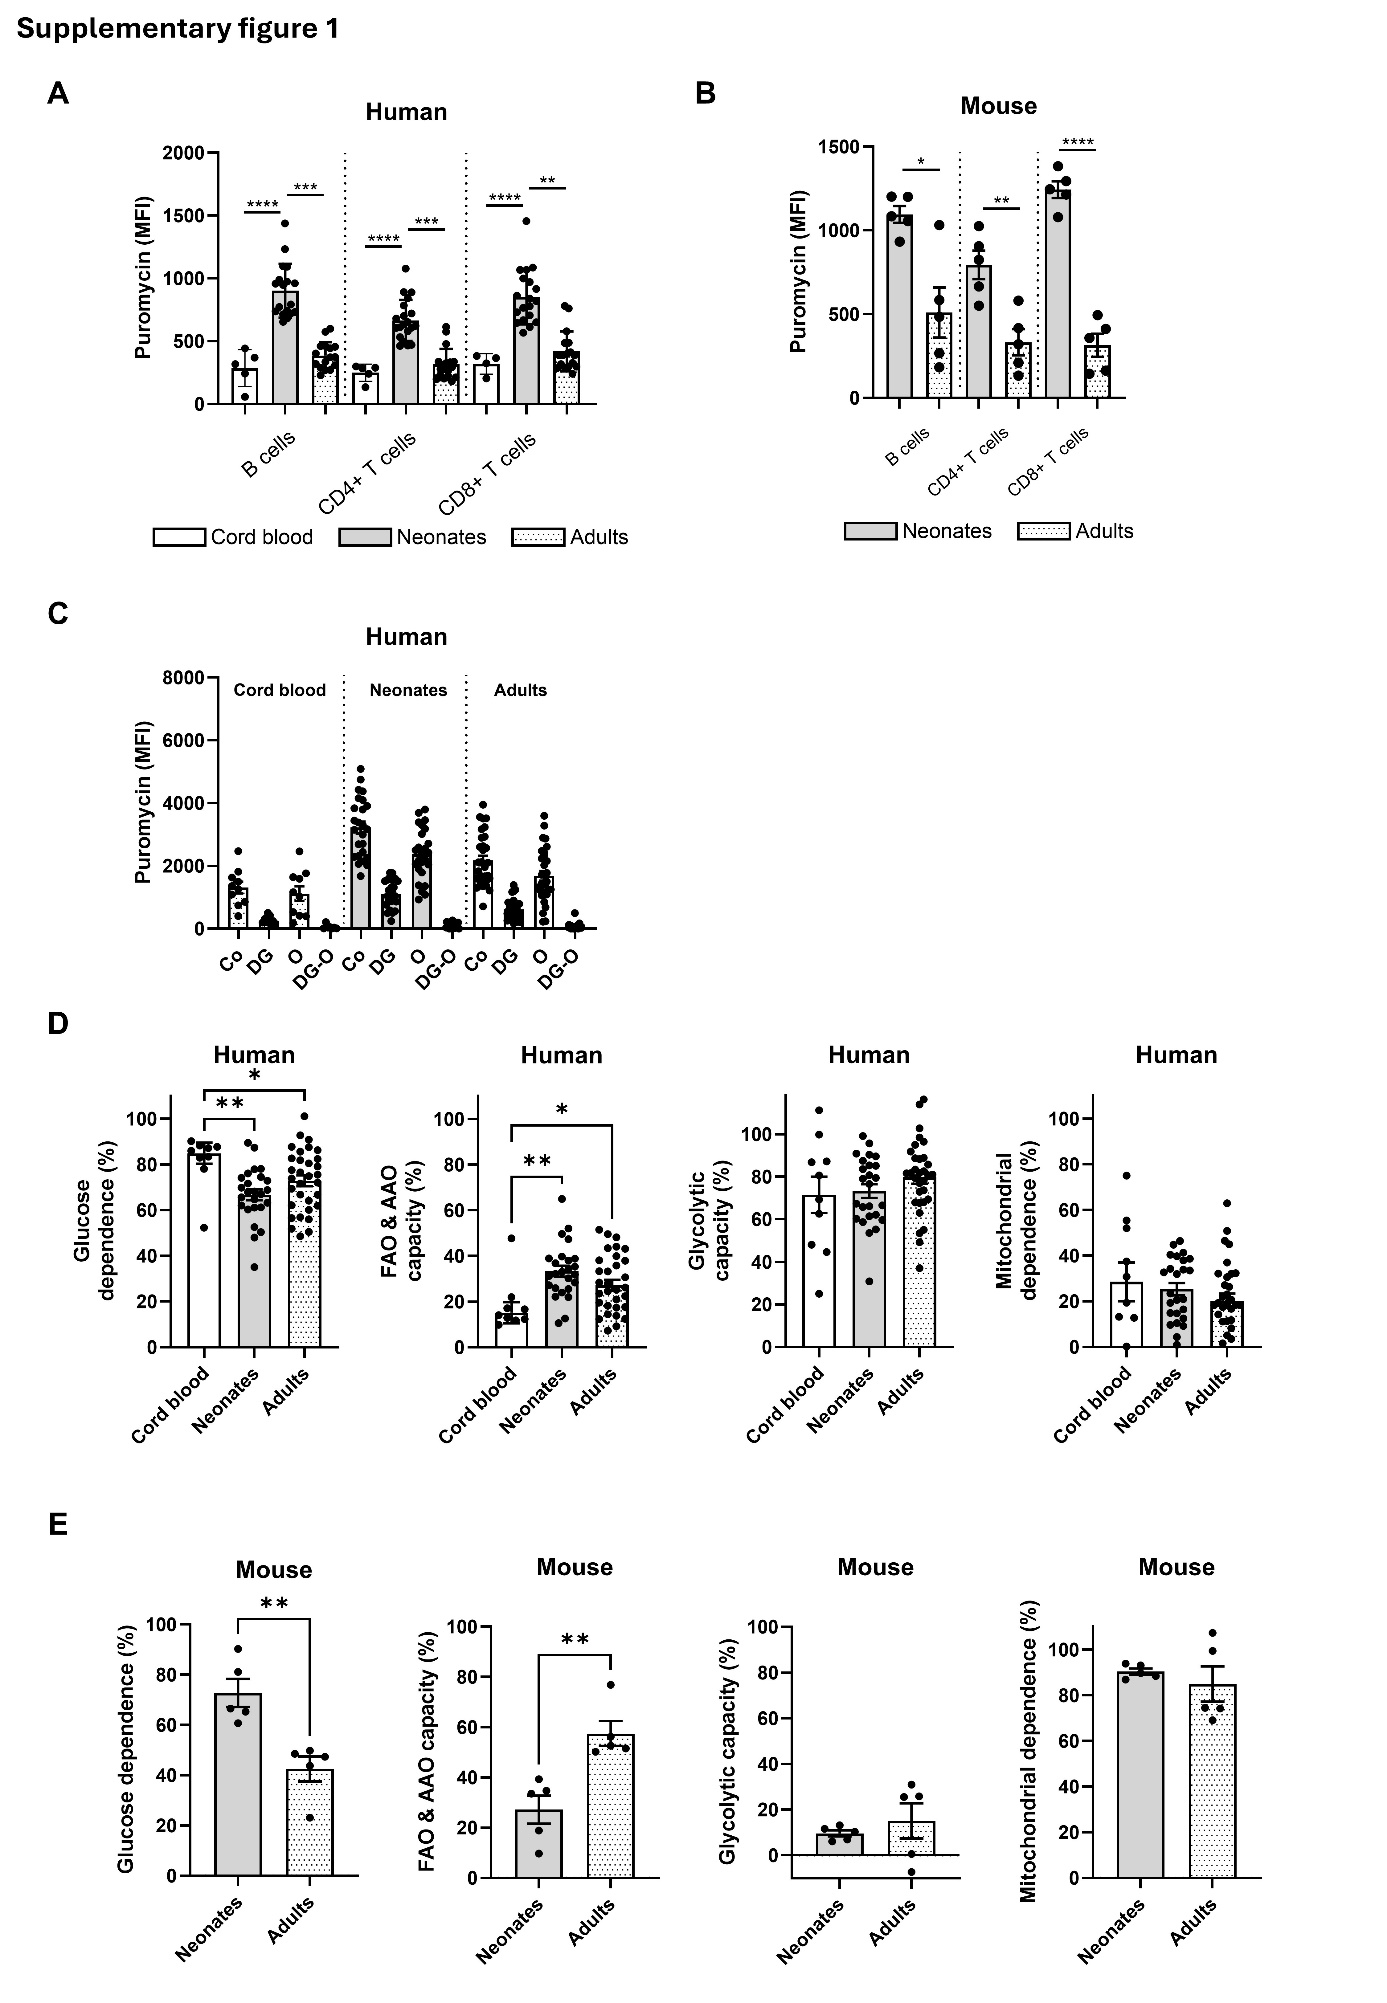


**Supplementary figure 1: Neonatal B cells and T cells are metabolically more active directly after birth. (A)** Metabolic activity of human CD19+ B cells, CD4+ T and CD8+ T cells measured by puromycin incorporation (MFI) using flow cytometry (cord blood *n = 4-5*, neonates (0-20 days old) *n = 18-20*, adults *n = 16-18*). **(B)** Metabolic activity of murine B220+ B cells, CD4+ T and CD8+ T cells measured by puromycin incorporation (MFI) using flow cytometry (*n = 5*) **(C)** Puromycin incorporation in human CD14+ monocytes after inhibiting glucose uptake using 2-Deoxy-D-glucose (2-DG) or oxidative phosphorylation using oligomycin (O) or a combination (DGO) using flow cytometry (cord blood *n = 10*, neonates (0-20 days old) *n = 25*, adults *n = 32*). **(D/E)** Glucose dependence (%), fatty acid and amino acid oxidation capacity (%), glycolytic capacity (%) and mitochondrial dependence (%) calculated by combining the data of the inhibitors 2-deoxy-glucose and oligomycin and the net protein biosynthesis in human CD14+ monocytes (cord blood *n = 10*, neonates (0-20 days old) *n = 25*, adults *n = 32*) **(D)** and murine Ly-6C+ monocytes (*n = 5*) **(E)**. Graphs show individual patient/mouse data with the bars representing mean±SEM. Kruskal-Wallis test with Dunn´s multiple comparisons test (A), Welch´s test (B, E), ordinary one-way ANOVA with Tukey´s multiple comparisons test (D).


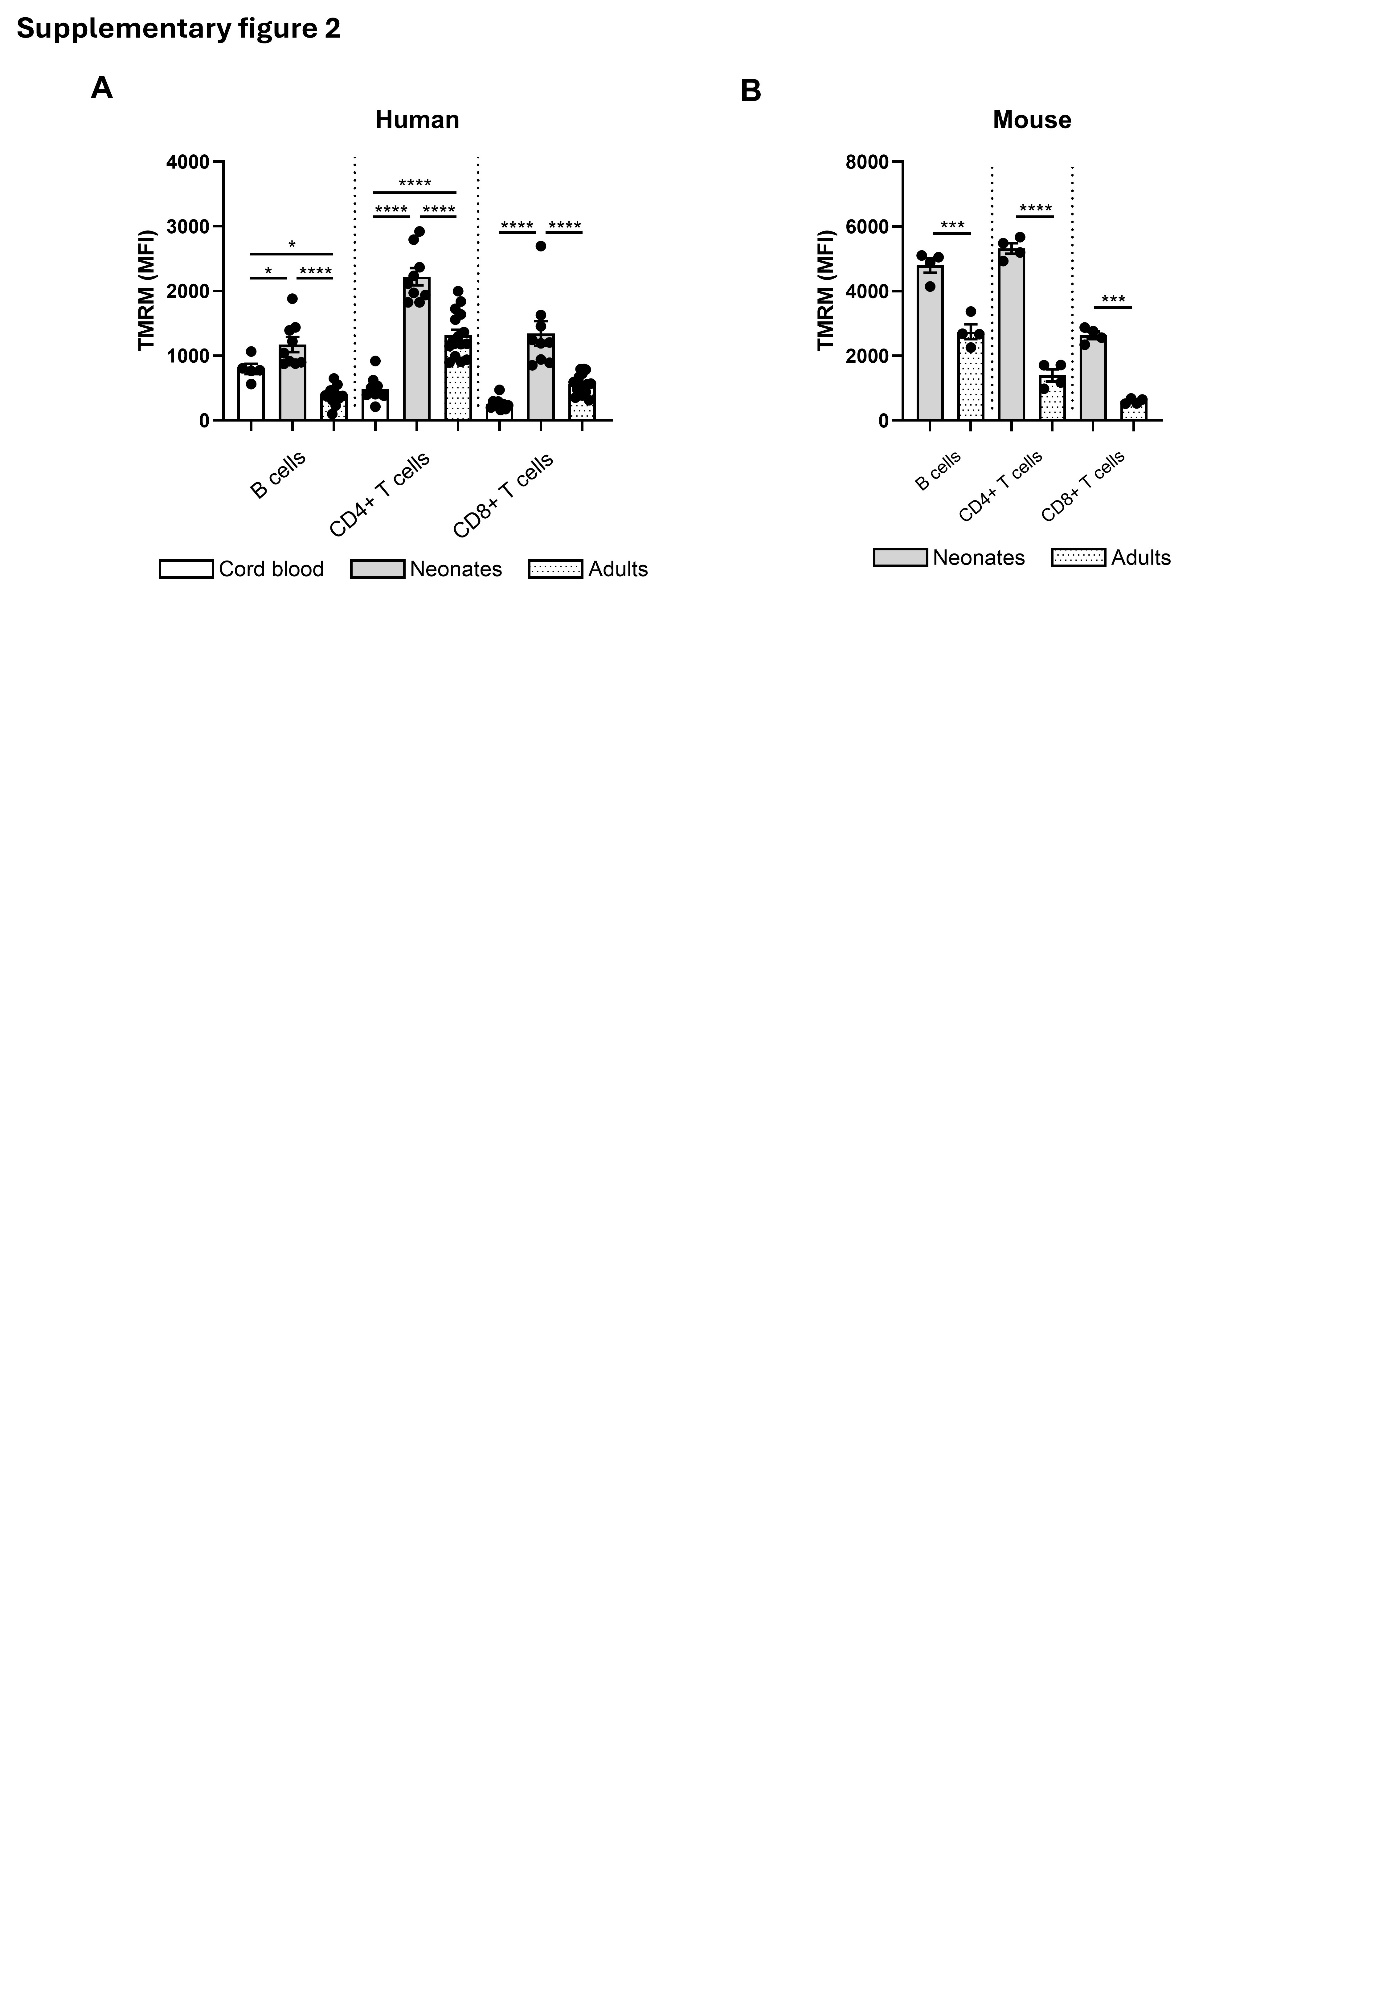


**Supplementary figure 2: Neonatal B cells and T cells show enhanced mitochondrial activity directly after birth.** Tetramethylrhodamine Methyl Ester (TMRM) was measured by flow cytometry to analyse mitochondrial membrane potential (ΔΨm). **(A)** Comparison of human CD19+ B cells, CD4+ and CD8+ T cells obtained from cord, neonatal and adults blood (for B cells: cord blood *n = 5*, neonates (0-20 days old) *n = 9*, adults *n = 12,* for T cells: cord blood *n = 9*, neonates (0-20 days old) *n = 9*, adults *n = 16*). **(B)** Comparison of murine B220+ B cells, CD4+ and CD8+ T cells in blood from neonates (6-8 days old, *n = 4*) and adults (12+ weeks old, *n = 4*). Graphs show individual patient/mouse data with the bars representing mean±SEM. Ordinary one-way ANOVA with Tukey´s multiple comparisons test (A), Welch´s test (B).


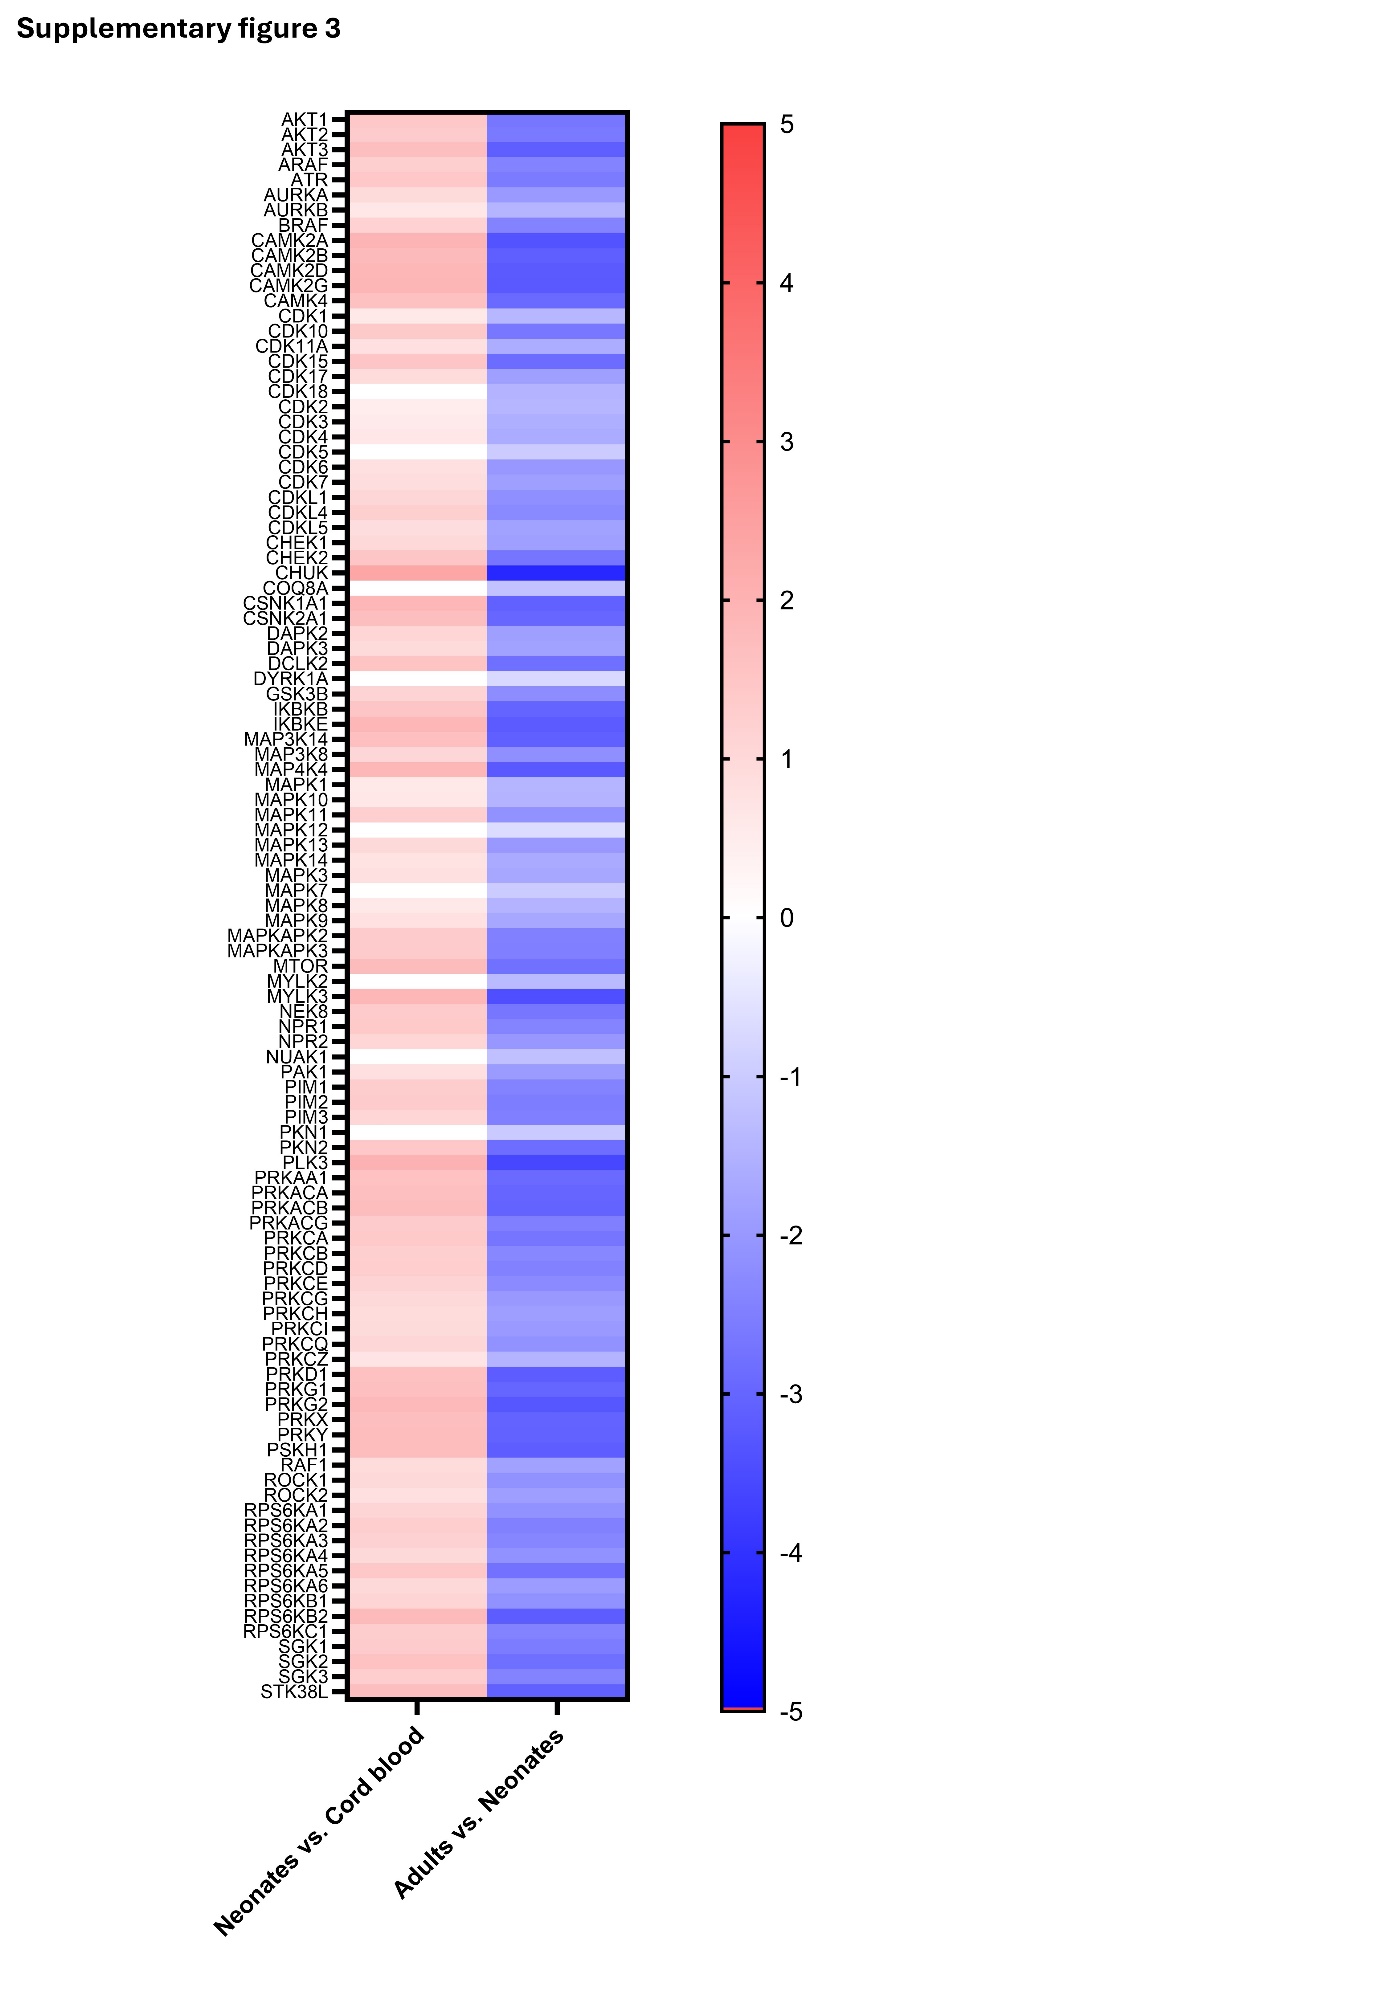


**Supplementary figure 3: Overall kinase activity is elevated within the first week after birth.** Heatmap of Serine-Threonine kinase (STK) activity showing effect size (mean kinase statistic) in plasma from cord, postnatal peripheral (1-7 days old), and adult blood, sorted alphabetically. Six biological replicates were included per group.

**Supplementary table 1**


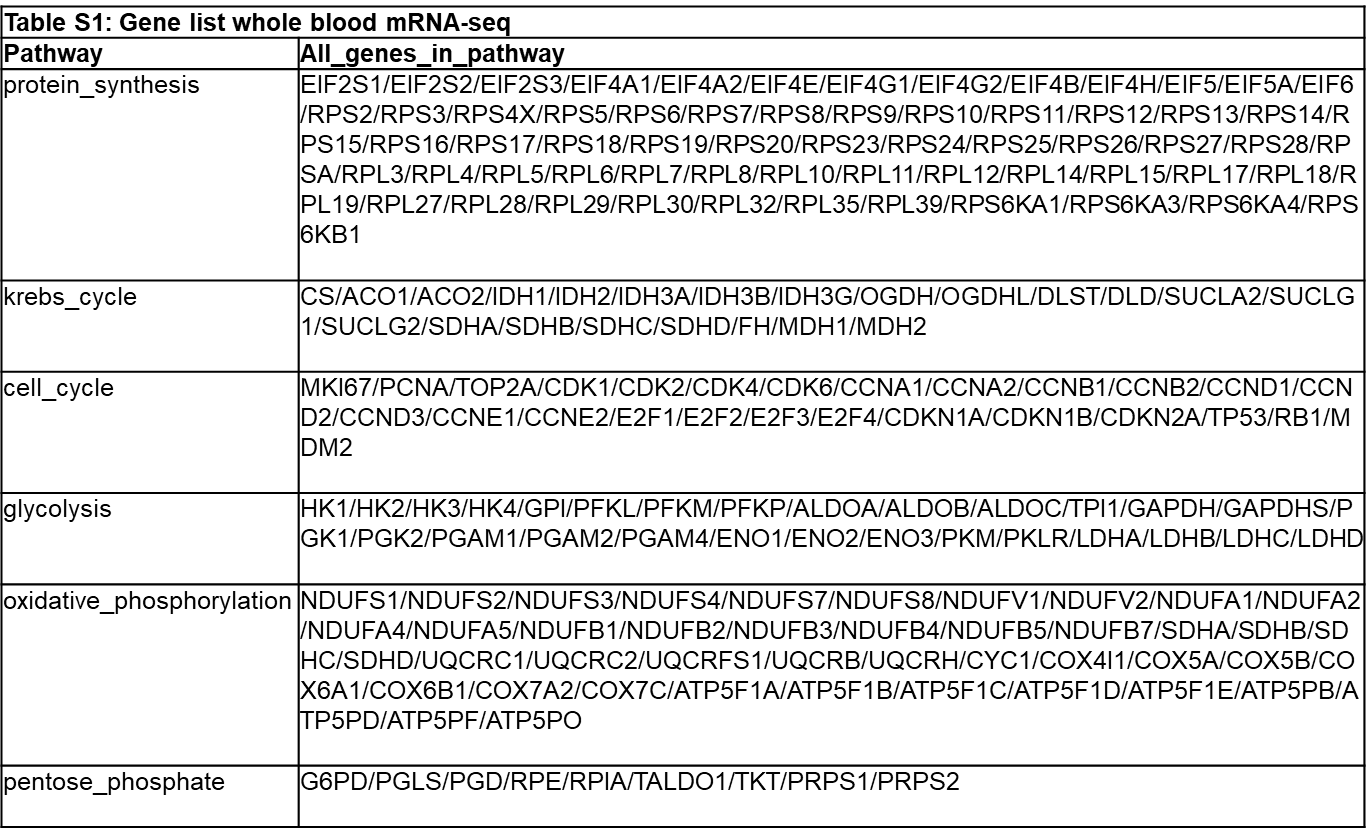

Supplement: Supplementary file 1 [file e1886efa45384582aa91e7f5.docx]
